# Supplementary material
Source: PubMed Central journal article supplement (PMC7456552)
Supplement: annrheumdis-2020-218479supp001.pdf [file annrheumdis-2020-218479supp001.pdf]

## A HISTORICALLY CONTROLLED COMPARISON OF GLUCOCORTICOID WITH- OR WITHOUT TOCILIZUMAB vs. SUPPORTIVE CARE ONLY IN PATIENTS WITH COVID-19-ASSOCIATED CYTOKINE STORM SYNDROME

### Results of the CHIC-study

#### Supplementary material

**Supplementary Table S1. Age and gender distribution of the treated and control groups**

| Age category | Treated group |       | Control group |       |     |
|--------------|---------------|-------|---------------|-------|-----|
|              | Females       | Males | Females       | Males |     |
| <50          | 0             | 6     | 0             | 6     | 12  |
| 50-60        | 4             | 13    | 4             | 13    | 34  |
| 60-70        | 5             | 19    | 5             | 19    | 48  |
| 70-80        | 6             | 22    | 6             | 22    | 56  |
| ≥80          | 3             | 8     | 3             | 8     | 22  |
| <b>Total</b> | 86            |       | 86            |       | 172 |

**Supplementary Table S2. Effect of treatment (vs control) on outcomes, from multivariable analysis stratified for low/high ferritin<sup>‡</sup>**

|                                                                    | Effect of treatment vs control in low ferritin<br>Multivariable analysis*<br>HR or coefficient<br>(95% CI) | Effect of treatment vs control in high ferritin<br>Multivariable analysis*<br>HR or coefficient<br>(95% CI) |
|--------------------------------------------------------------------|------------------------------------------------------------------------------------------------------------|-------------------------------------------------------------------------------------------------------------|
| <i>Primary outcome</i>                                             |                                                                                                            |                                                                                                             |
| <b>Clinical improvement (2 points) in WHO score<sup>§</sup></b>    | 1.59 (0.72; 3.52)                                                                                          | 2.72 (1.35; 5.48)                                                                                           |
| <i>Key secondary outcomes</i>                                      |                                                                                                            |                                                                                                             |
| <b>In-hospital mortality<sup>§</sup></b>                           | 0.17 (0.06; 0.54)                                                                                          | 0.07 (0.01; 0.40)                                                                                           |
| <b>Mechanical ventilation<sup>§</sup></b>                          | 0.44 (0.12; 1.63)                                                                                          | 0.24 (0.05; 1.31)                                                                                           |
| <i>Other secondary outcomes</i>                                    |                                                                                                            |                                                                                                             |
| <b>Clinical improvement (1 point) in WHO score<sup>§</sup></b>     | 1.73 (0.79; 3.78)                                                                                          | 2.62 (1.34; 5.12)                                                                                           |
| <b>Independence from oxygen therapy<sup>§</sup></b>                | 1.50 (0.64; 3.54)                                                                                          | 2.76 (1.35; 5.64)                                                                                           |
| <b>Duration of mechanical ventilation in survivors<sup>±</sup></b> | ‡                                                                                                          | ‡                                                                                                           |
| <b>Duration of hospitalization in survivors<sup>±</sup></b>        | -4.05 (-9.29; 1.19)                                                                                        | -5.31 (-12.02; 1.39)                                                                                        |

<sup>‡</sup> Stratified at 1419µg/L, median of ferritin at baseline

\*Adjusted for age, gender, body mass index, smoking status, hypertension, diabetes, cardiovascular disease and arrhythmia

<sup>§</sup> Results from Cox regression models

<sup>±</sup> Results from linear regression models

<sup>‡</sup> Not possible to run due to low number of patients in each stratum

HR, hazard ratio; CI, confidence interval, WHO, World Health Organization

Supplementary Table S3. Outcomes from the sensitivity analyses

|                                                     | Treated group<br>N = 86 | Control group<br>N = 86 | p-value* |
|-----------------------------------------------------|-------------------------|-------------------------|----------|
| <b>Primary outcome</b>                              |                         |                         |          |
| <b>Clinical improvement (2 points) in WHO score</b> |                         |                         |          |
| <i>Excluding ventilated patients at baseline</i>    |                         |                         |          |
| - Number of improvements                            | 63                      | 38                      | 0.0154   |
| - Daily incidence rate (95% CI)                     | 7.0% (5.5; 9.0)         | 4.4% (3.2; 6.0)         |          |
| - 25% Survival time (days)                          | 6                       | 7                       |          |
| - 50% Survival time (days)                          | 10                      | 16                      |          |
| <i>Excluding patients receiving TCZ</i>             |                         |                         |          |
| - Number of improvements                            | 39                      | 44                      | <0.0001  |
| - Daily incidence rate (95% CI)                     | 9.1% (6.7; 12.5)        | 4.0% (3.0; 5.4)         |          |
| - 25% Survival time (days)                          | 6                       | 8                       |          |
| - 50% Survival time (days)                          | 8                       | 18                      |          |
| <i>Excluding extreme age groups</i>                 |                         |                         |          |
| - Number of improvements                            | 53                      | 36                      | 0.0014   |
| - Daily incidence rate (95% CI)                     | 6.9% (5.2; 9.0)         | 3.7% (2.7; 5.2)         |          |
| - 25% Survival time (days)                          | 6                       | 10                      |          |
| - 50% Survival time (days)                          | 10                      | 19                      |          |
| <b>Key secondary outcomes</b>                       |                         |                         |          |
| <b>Hospital mortality</b>                           |                         |                         |          |
| <i>Excluding ventilated patients at baseline</i>    |                         |                         |          |
| - Number of deaths                                  | 14                      | 34                      | 0.003    |
| - Daily incidence rate (95% CI)                     | 1.5% (0.9; 2.6)         | 3.9% (2.8; 5.4)         |          |
| - 25% Survival time (days)                          | 16                      | 5                       |          |
| - 50% Survival time (days)                          | --                      | 17                      |          |
| <i>Excluding patients receiving TCZ</i>             |                         |                         |          |
| - Number of deaths                                  | 7                       | 41                      | 0.0089   |
| - Daily incidence rate (95% CI)                     | 1.6% (0.8; 3.4)         | 3.5% (2.6; 4.7)         |          |
| - 25% Survival time (days)                          | 16                      | 5                       |          |
| - 50% Survival time (days)                          | --                      | 18                      |          |
| <i>Excluding extreme age groups</i>                 |                         |                         |          |
| - Number of deaths                                  | 9                       | 32                      | 0.0012   |
| - Daily incidence rate (95% CI)                     | 1.1% (0.6; 2.2)         | 3.0% (2.1; 4.3)         |          |
| - 25% Survival time (days)                          | 19                      | 7                       |          |
| - 50% Survival time (days)                          | --                      | 18                      |          |
| <b>Mechanical ventilation</b>                       |                         |                         |          |
| <i>Excluding patients receiving TCZ</i>             |                         |                         |          |
| - Number of mechanical ventilation                  | 2                       | 24                      | 0.0001   |
| - Daily incidence rate (95% CI)                     | 0.6% (1.4; 2.3)         | 5.4% (3.6; 8.0)         |          |
| - 25% Survival time (days)                          | --                      | 3                       |          |
| - 50% Survival time (days)                          | --                      | --                      |          |
| <i>Excluding extreme age groups</i>                 |                         |                         |          |
| - Number of mechanical ventilation                  | 10                      | 22                      | 0.0010   |
| - Daily incidence rate (95% CI)                     | 1.6% (0.9; 3.1)         | 6.0% (3.9; 9.1)         |          |
| - 25% Survival time (days)                          | --                      | 3                       |          |
| - 50% Survival time (days)                          | --                      | --                      |          |
| <b>Other secondary outcomes</b>                     |                         |                         |          |
| <b>Clinical improvement (1 point) in WHO score</b>  |                         |                         |          |
| <i>Excluding ventilated patients at baseline</i>    |                         |                         |          |
| - Number of improvements                            | 68                      | 39                      | 0.0033   |
| - Daily incidence rate (95% CI)                     | 8.8% (6.9; 11.1)        | 5.0 (3.7; 6.9%)         |          |
| - 25% Survival time (days)                          | 5                       | 6                       |          |
| - 50% Survival time (days)                          | 9                       | 14                      |          |
| <i>Excluding patients receiving TCZ</i>             |                         |                         |          |
| - Number of improvements                            | 42                      | 45                      | <0.0001  |
| - Daily incidence rate (95% CI)                     | 12% (8.9; 16.3)         | 4.6% (3.4; 6.2)         |          |
| - 25% Survival time (days)                          | 4                       | 7                       |          |
| - 50% Survival time (days)                          | 6                       | 16                      |          |
| <i>Excluding extreme age groups</i>                 |                         |                         |          |
| - Number of improvements                            | 55                      | 37                      | 0.0006   |
| - Daily incidence rate (95% CI)                     | 8.2% (6.3; 10.7)        | 4.2% (3.1; 5.9)         |          |
| - 25% Survival time (days)                          | 5                       | 8                       |          |
| - 50% Survival time (days)                          | 9                       | 18                      |          |
| <b>Independence from oxygen therapy</b>             |                         |                         |          |
| <i>Excluding ventilated patients at baseline</i>    |                         |                         |          |
| - Number of patients free of oxygen                 | 60                      | 37                      | 0.0475   |
| - Daily incidence rate (95% CI)                     | 6.0% (4.7; 7.8)         | 4.0% (2.9; 5.5)         |          |
| - 25% Survival time (days)                          | 6                       | 8                       |          |
| - 50% Survival time (days)                          | 10                      | 17                      |          |

|                                                                       |                  |                 |        |
|-----------------------------------------------------------------------|------------------|-----------------|--------|
| <i>Excluding patients receiving TCZ</i>                               |                  |                 |        |
| - Number of patients free of oxygen                                   | 38               | 40              | 0.0001 |
| - Daily incidence rate (95% CI)                                       | 7.7% (5.6; 10.6) | 3.3% (2.4; 4.4) |        |
| - 25% Survival time (days)                                            | 10               | 4               |        |
| - 50% Survival time (days)                                            | 19               | 8               |        |
| <i>Excluding extreme age groups</i>                                   |                  |                 |        |
| - Number of patients free of oxygen                                   | 51               | 32              | 0.0016 |
| - Daily incidence rate (95% CI)                                       | 5.8% (4.4; 7.6)  | 2.9% (2.0; 4.1) |        |
| - 25% Survival time (days)                                            | 6                | 10              |        |
| - 50% Survival time (days)                                            | 11               | 20              |        |
| <b>Duration of mechanical ventilation in survivors (days)</b>         |                  |                 |        |
| <i>Excluding ventilated patients at baseline</i>                      | 14.3 (11.3)      | 18.0 (10.3)     | 0.4840 |
| <i>Excluding patients receiving TCZ</i>                               | 22.0 (11.3)      | 18.8 (10.2)     | 0.6835 |
| <i>Excluding extreme age groups</i>                                   | 16.3 (11.9)      | 20.5 (10.4)     | 0.3899 |
| <b>Duration of hospitalization in survivors and discharged (days)</b> |                  |                 |        |
| <i>Excluding ventilated patients at baseline</i>                      | 10.3 (5.7)       | 15.8 (13.0)     | 0.0163 |
| <i>Excluding patients receiving TCZ</i>                               | 9.3 (7.5)        | 15.9 (12.7)     | 0.0058 |
| <i>Excluding extreme age groups</i>                                   | 11.0 (7.2)       | 16.8 (13.4)     | 0.0273 |

Data are number of cases, n (%), incidence rate with 95% confidence interval, number of days or mean (standard deviation), as indicated

\*Calculated with t-test, Chi-square or log-rank test, as appropriate

WHO, World Health Organization; CI, confidence interval; TCZ, tocilizumab

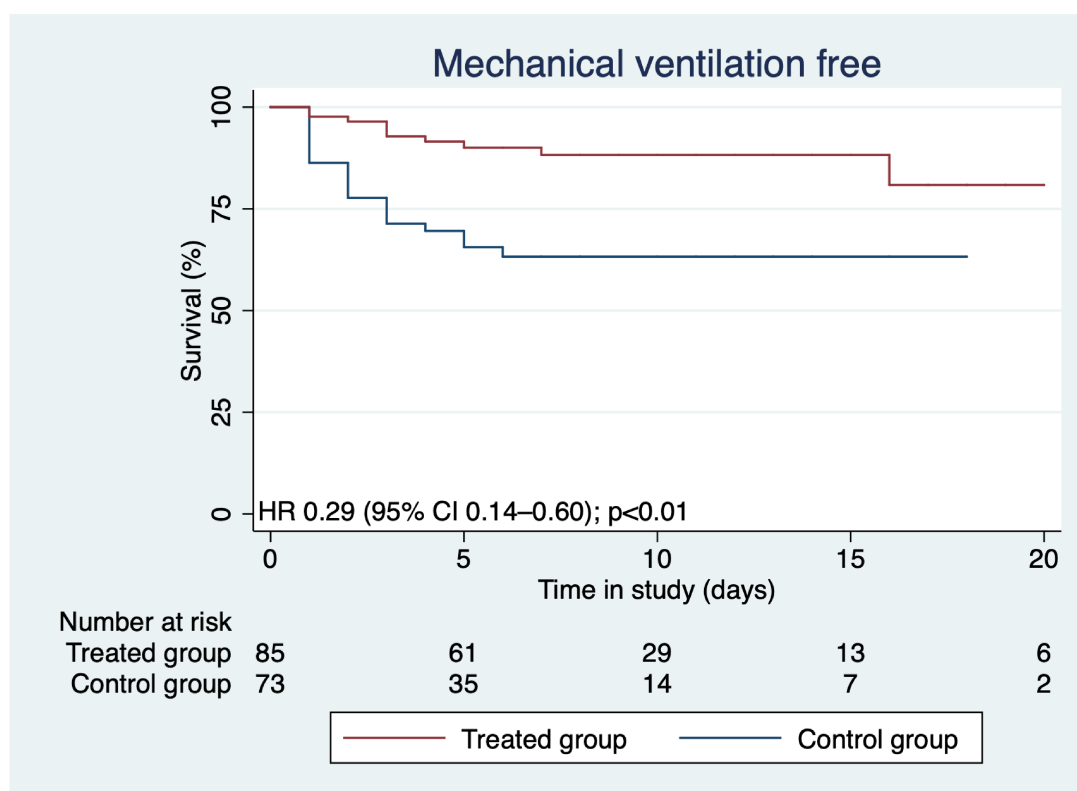

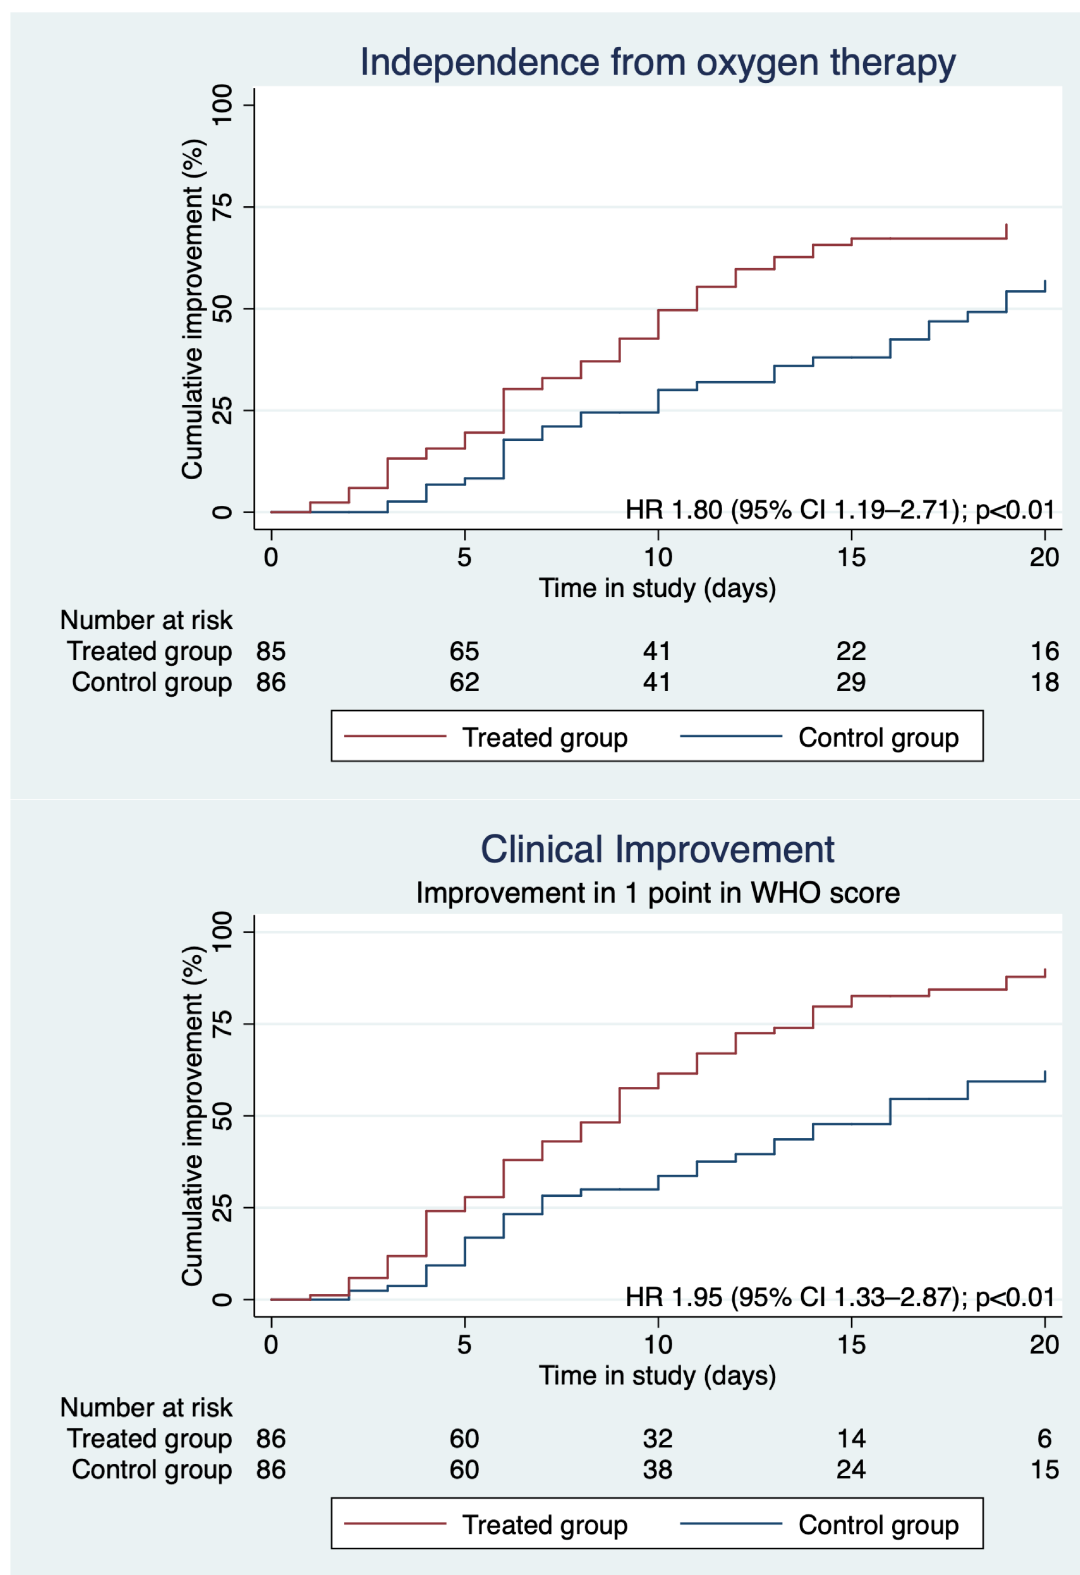

Supplementary Figure S1. Mechanical ventilation free, independence from oxygen therapy and clinical improvement.

Plots show mechanical ventilation free (A), independence from oxygen therapy (B) and clinical improvement (C) defined as a 1-point improvement in the 7-point WHO score, in patients with COVID-19 associated cytokine-release syndrome stratified for treatment (treated vs control group).  
HR, hazard ratio; CI, confidence interval

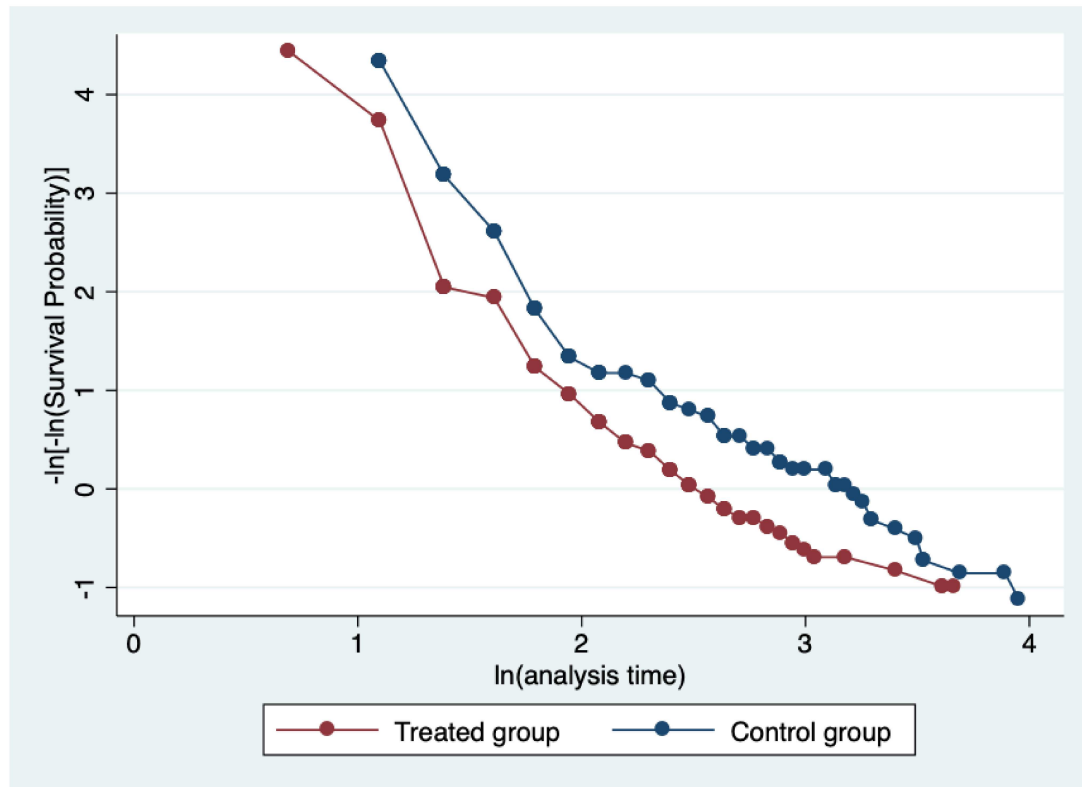

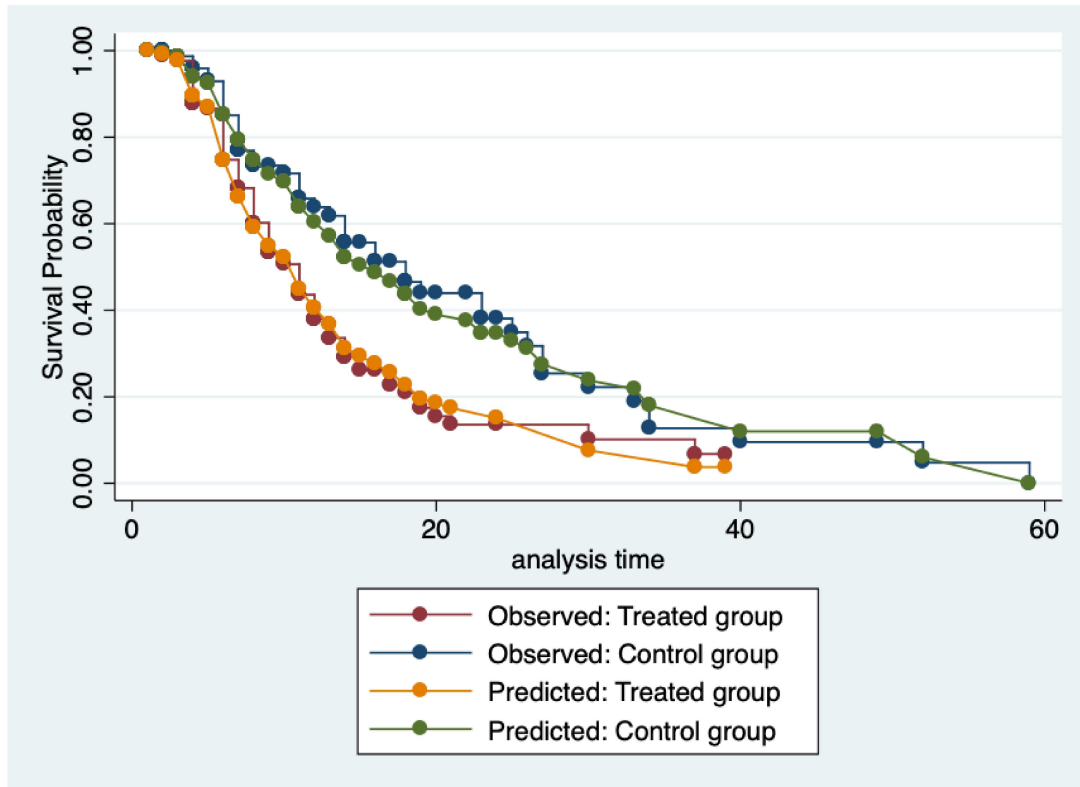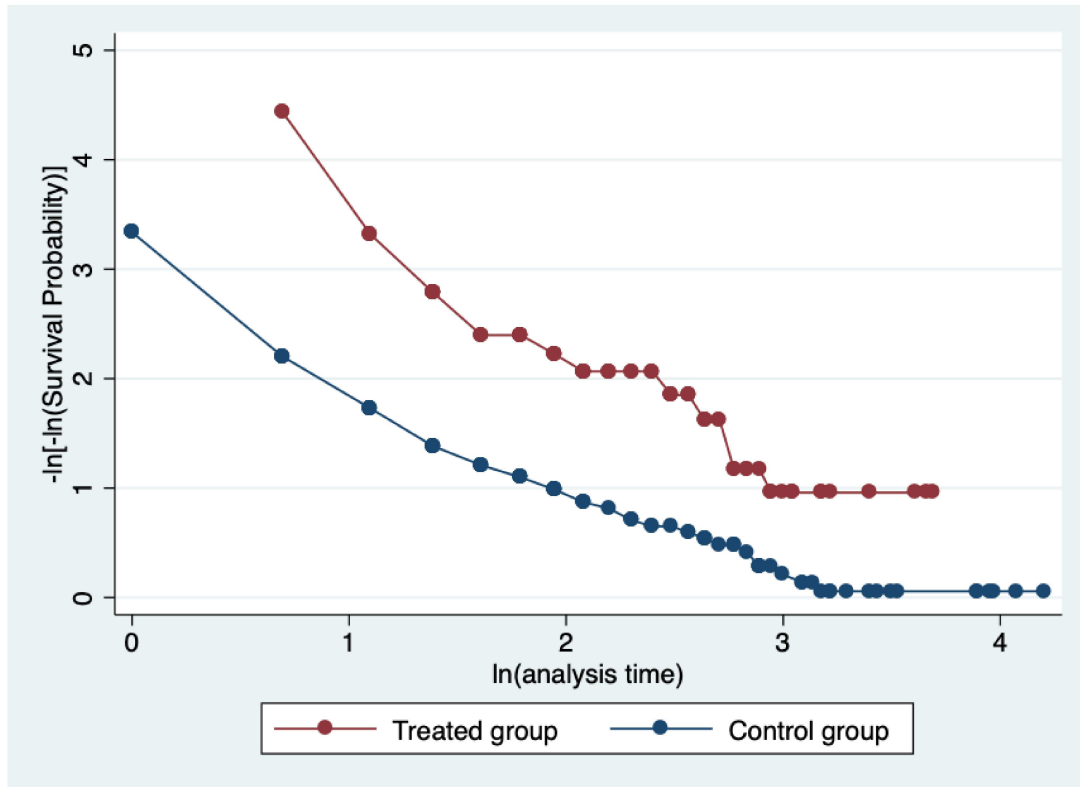

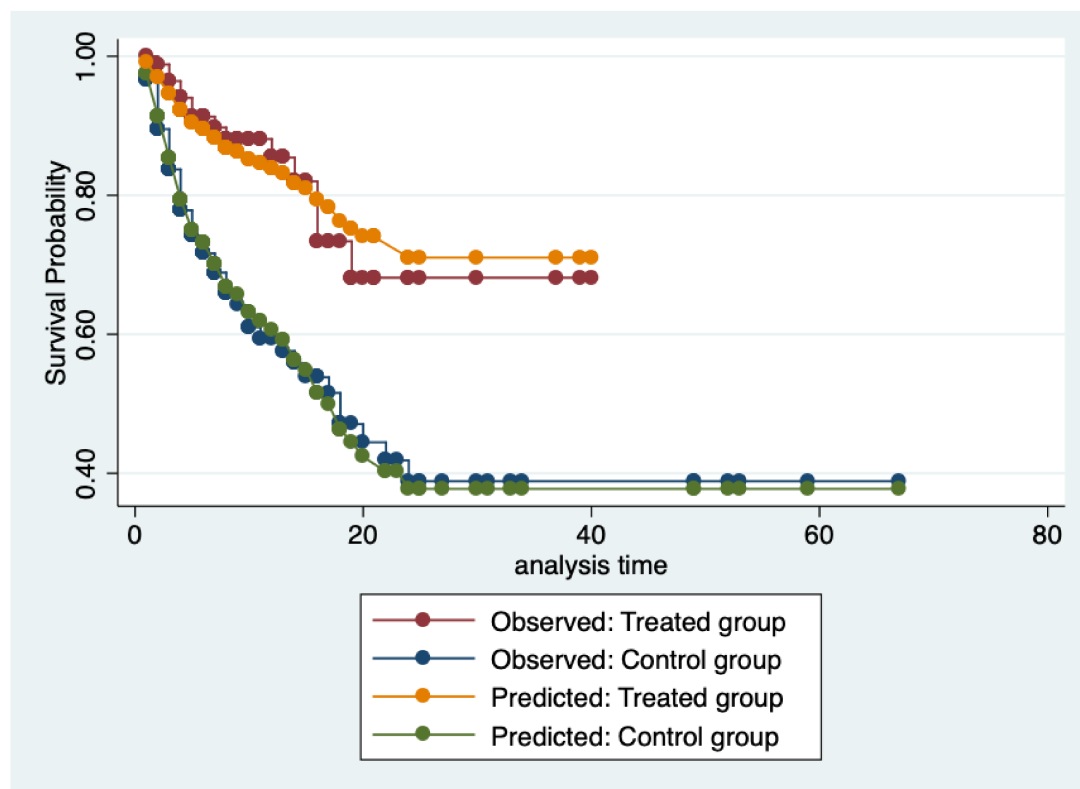

**Supplementary Figure S2. Proportional-hazards assumption graphs for the 2 main outcomes.**

Plots show log-log plot of survival for the WHO 2-point clinical improvement (A), Kaplan-Meier and predicted survival plot for the WHO 2-point clinical improvement (B), log-log plot of survival for hospital mortality (C), Kaplan-Meier and predicted survival plot for hospital mortality (D). A and C display lines that are parallel, implying that the proportional-hazards assumption for treatment (vs control) has not been violated. This is confirmed in figures B and D, where the observed values and predicted values are close together.
